# Supplementary material for: Is High-Dose Tranexamic Safe in Spine Surgery? A Systematic Review and Meta-Analysis
Source: PubMed Central journal article supplement — Global Spine J. 2023 Jan 2;13(7):2085–95. doi: 10.1177/21925682221148686 (PMC10556905; doi:10.1177/21925682221148686), 2023-01-02
Supplement: sj-pdf-1-gsj-10.1177_21925682221148686.pdf [file sj-pdf-1-gsj-10.1177_21925682221148686.pdf]

| <b>Randomized Controlled Trial</b> | <b>Bias due to randomization</b> | <b>Bias due to deviation from intended intervention</b> | <b>Bias due to missing data</b> | <b>Bias due to outcome measurement</b> | <b>Bias due to selection of reported result</b> | <b>Overall</b> |
|------------------------------------|----------------------------------|---------------------------------------------------------|---------------------------------|----------------------------------------|-------------------------------------------------|----------------|
| <i>Elwatidy</i>                    | Low                              | Low                                                     | Low                             | Low                                    | Low                                             | Low            |
| <i>Goobie</i>                      | Low                              | Low                                                     | Low                             | Low                                    | Low                                             | Low            |
| <i>Halanski</i>                    | Some concerns                    | Some concerns                                           | Some concerns                   | Some concerns                          | Low                                             | Some concerns  |
| <i>Hasan</i>                       | Low                              | Low                                                     | Low                             | Low                                    | Low                                             | Low            |
| <i>Ramkiran</i>                    | High                             | Some concerns                                           | Low                             | Some concerns                          | Low                                             | Some concerns  |
| <i>Sethna</i>                      | Low                              | Low                                                     | Low                             | Some concerns                          | Low                                             | Low            |
| <i>Shi</i>                         | Low                              | Low                                                     | Some concerns                   | Low                                    | Low                                             | Low            |
| <i>Zhang</i>                       | High                             | Low                                                     | Low                             | Low                                    | Low                                             | Some concerns  |

*Risk of bias was assessed using the Cochrane ROB2 tool for randomized trials*

Appendix 1a – Table showing the results of risk of bias assessments for RTCs.

| <b>Retrospective Cohort Studies</b> | <b>Newcastle-Ottawa Score</b> |
|-------------------------------------|-------------------------------|
| <i>Ahlers</i>                       | 7                             |
| <i>Chou</i>                         | 6                             |
| <i>DaRocha</i>                      | 7                             |
| <i>Dhawale</i>                      | 8                             |
| <i>Haddad</i>                       | 6                             |
| <i>Johnson</i>                      | 5                             |
| <i>Kushioka</i>                     | 7                             |
| <i>Lykissas</i>                     | 7                             |
| <i>Ng</i>                           | 5                             |
| <i>Raman</i>                        | 9                             |
| <i>Shapiro</i>                      | 8                             |
| <i>Sui</i>                          | 8                             |
| <i>Tumber</i>                       | 7                             |
| <i>Xie</i>                          | 6                             |

*Risk of bias was assessed using the Newcastle Ottawa Scale for retrospective cohort studies, with a score of 7-9 classified as low risk of bias, and a score of 4-6 as a high risk of bias*

Appendix 1b – Table showing the results of risk of bias assessments for retrospective cohort studies.

| Outcomes                                                                 | Statistical Method Details                                                                                                                                                                                                                                                                                                  |
|--------------------------------------------------------------------------|-----------------------------------------------------------------------------------------------------------------------------------------------------------------------------------------------------------------------------------------------------------------------------------------------------------------------------|
| Medical complications<br>VTE complications<br>Surgical complications     | Details on meta-analytical method: <ul style="list-style-type: none"> <li>- Mantel-Haenszel method</li> <li>- Paule-Mandel estimator for <math>\tau^2</math></li> <li>- Treatment arm continuity correction in studies with zero cell frequencies</li> <li>- Studies with double zeros included in meta-analysis</li> </ul> |
| Intra-Op Transfusion Events<br>Peri-Op Transfusion Events                | Details on meta-analytical method: <ul style="list-style-type: none"> <li>- Mantel-Haenszel method</li> <li>- Restricted maximum-likelihood estimator for <math>\tau^2</math></li> </ul>                                                                                                                                    |
| Intra-Op Transfusion Vol<br>Peri-Op Transfusion Vol<br>Surgical Duration | Details on meta-analytical method: <ul style="list-style-type: none"> <li>- Inverse variance method</li> <li>- Restricted maximum-likelihood estimator for <math>\tau^2</math></li> <li>- Q-profile method for confidence interval of <math>\tau^2</math> and <math>\tau</math></li> </ul>                                  |

Appendix 2 – Table showing the parameters with which meta-analyses were performed using the ‘meta’ package in RStudio for the various outcomes of interest.

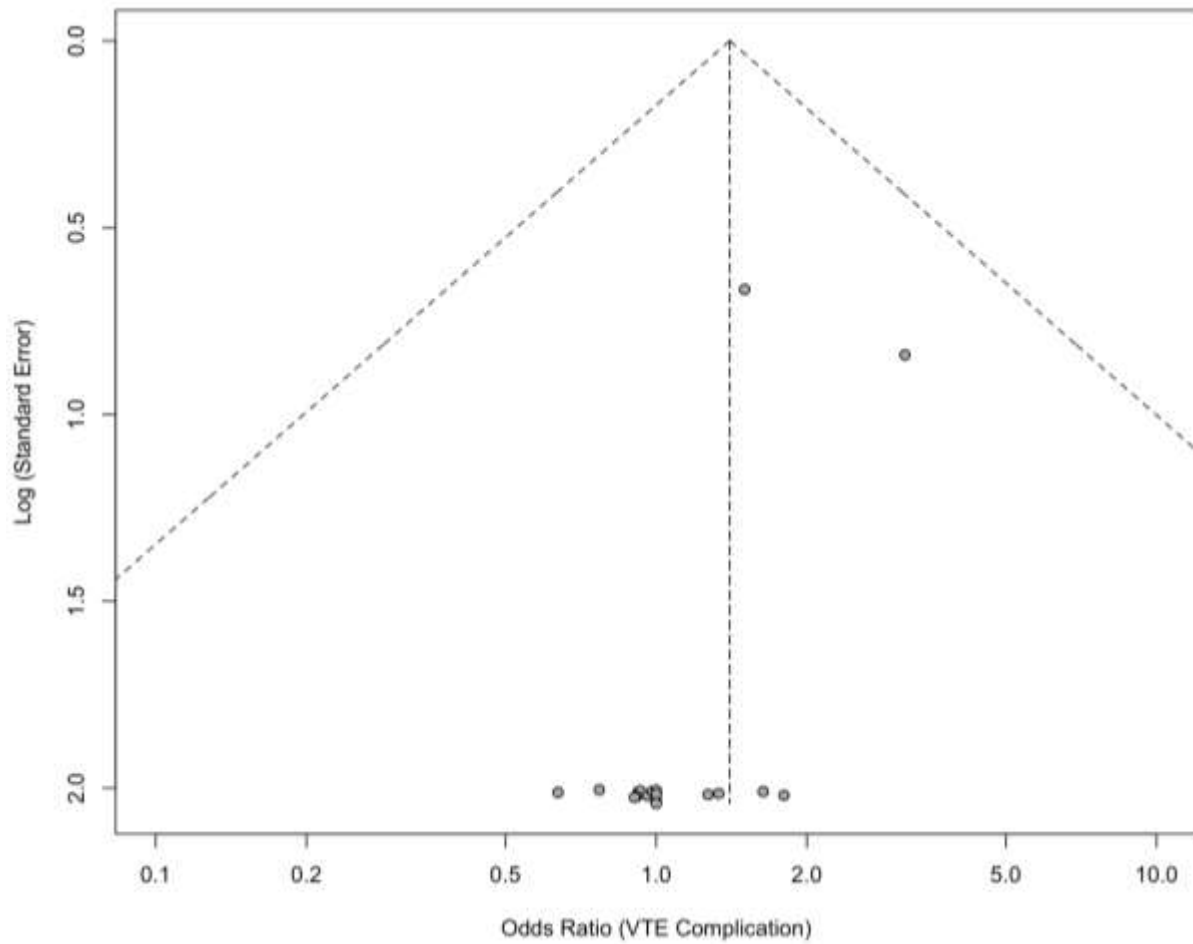

Appendix 3 – Funnel plot performed on the outcome VTE complications. The natural log of standard error is given on the y-axis.

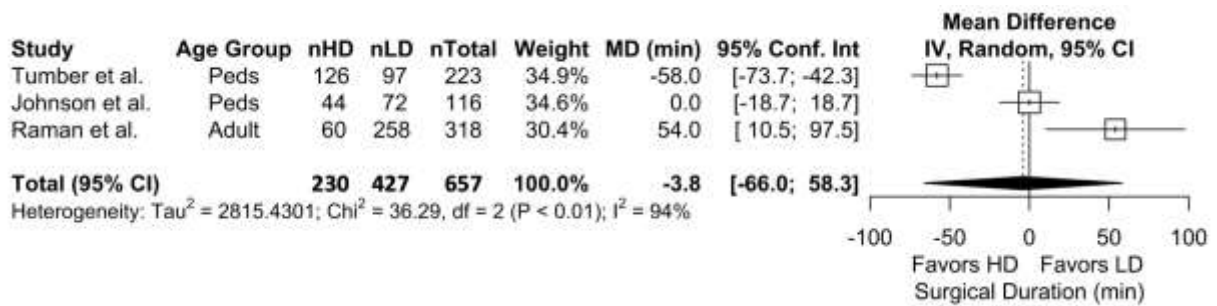

Appendix 4 - Meta-analysis with a random effects model comparing surgical duration (min) between high-dose (HD) and low-dose (LD) cohorts across all age groups. nHD = number of HD patients, nLD = number of LD patients, nTotal = total patients. MD = mean difference, IV = inverse variance, df = degrees of freedom.
